# Supplementary material for: Synthesis, structure and molecular modelling of anionic carbosilane dendrimers
Source: Royal Society of Chemistry journal article supplement (doi:10.1039/c2dt31099f), 2012-01-01
Supplement: c2dt31099f.pdf [file c2dt31099f.pdf]

For Supporting Information:

## Synthesis, Structure and Molecular Modelling of Anionic Carbosilane Dendrimers

Beatriz Rasines,<sup>a</sup> Javier Sánchez-Nieves,<sup>a</sup> Massimo Maiolo,<sup>b</sup> Marek Maly,<sup>b,c</sup> Louis Chonco,<sup>d</sup> José Luis Jiménez,<sup>e</sup> M. Ángeles Muñoz-Fernández,<sup>d</sup> F. Javier de la Mata<sup>a,\*</sup> and Rafael Gómez<sup>a,\*</sup>

[rafael.gomez@uah.es](mailto:rafael.gomez@uah.es)

**RECEIVED DATE (to be automatically inserted after your manuscript is accepted if required according to the journal that you are submitting your paper to)**

<sup>a</sup> Dpto. de Química Inorgánica, Universidad de Alcalá, Campus Universitario, E-28871 Alcalá de Henares (Madrid) Spain. FAX: 00 34 91 885 4683; Phone: 00 34 91 885 4685. Networking Research Center on Bioengineering, Biomaterials and Nanomedicine (CIBER-BBN).

<sup>b</sup> University of Applied Science of Southern Switzerland, Department of Innovative Technologies. SUPSI-DTI Galleria 2, CH-6928 Manno, Switzerland.

<sup>c</sup> Faculty of Science, J. E. Purkinje University, Ceske mladeze 8, 400 96 Usti n. L., Czech Republic.

<sup>d</sup> Laboratorio de Inmunología Molecular, Hospital General Universitario Gregorio Marañón, Madrid (Spain). Networking Research Center on Bioengineering, Biomaterials and Nanomedicine (CIBER-BBN).

<sup>e</sup> Plataforma de Laboratorio, Hospital General Universitario Gregorio Marañón, Madrid (Spain). Networking Research Center on Bioengineering, Biomaterials and Nanomedicine (CIBER-BBN), Spain.  
-BBN), Spain.

## Interaction of anionic dendrimers with Na<sup>+</sup> cations

As we can see on Figure 5E (from main text), one narrow peak is observed whose center is located at 2.35 Å and dominates to all six profiles. This fact means that the most frequently occupied distance of Na<sup>+</sup> ions respect to terminal oxygens is in both cases (CO<sub>2</sub><sup>-</sup>, SO<sub>3</sub><sup>-</sup>) 2.35 Å. However, the peaks belonging to sulfonate-terminated dendrimers are almost identical (not influenced by dendrimer core) and significantly smaller than that obtained for the non-protonated carboxylate structures. Density maxima obtained from carboxylate dendrimers (non-protonated) differ and the height of phenoxo cored dendrimer peak is 1.57 times bigger than in case of the Si cored one. The above observations indicate stronger interaction of Na<sup>+</sup> ions with carboxylate surface where stronger one-to-one interaction of Na<sup>+</sup> ions with individual CO<sub>2</sub> groups is combined with better ability of cooperative stabilization of Na<sup>+</sup> ions with these terminal groups (see Figure S6 in Supporting Information). Moreover, this cooperative stabilization is better in case of polyphenoxo cored Dendrimer with CO<sub>2</sub> units than in case of Si cored ones, partially explaining the difference between profiles of dendrimers **8** and **11**. In addition, as it was proved by our short additional simulations with rigid (constrained) structures the flexibility of CO<sub>2</sub> groups is not as important here as their previously established distribution and mutual orientation on dendrimer surface which was anyway achieved with partial contribution of strong Na<sup>+</sup>...CO<sub>2</sub><sup>-</sup> one-to-one interaction. This active role of Na<sup>+</sup> ions in the surface could be also seen from the existence of the mutual oxygen radial density maxima located *ca.* at 4 Å, which is evident especially in case of non-protonized dendrimer **8** while in case of protonated version **8p** this maximum disappeared as there are no close Na<sup>+</sup> ions which could be able to induce relevant CO<sub>2</sub>-CO<sub>2</sub> configurations (see Figures 5F and S6 in Supplementary Information). The stronger interaction of Na<sup>+</sup> ions with non-protonated CO<sub>2</sub> terminated dendrimers may also partially explain their slightly smaller size and surface comparing to the sulfonate or protonated carboxylate ones (see Table 1). The presence of more and/or more stable Na<sup>+</sup> ions in close proximity of dendrimer surface might more effectively contributes to the screening of the dendrimer surface charge (Na<sup>+</sup> ions may even act here as some effective internal glue). This feature may induce a little more compact and therefore also slightly smaller structure. Another partial contributions regarding the measured differences in size may come also from differences in N-CO<sub>2</sub>, N-SO<sub>3</sub> (*ca.* 1.5 Å, 1.8 Å) and C-O, S-O (*ca.* 1.1 Å, 1.4 Å) bond lengths.

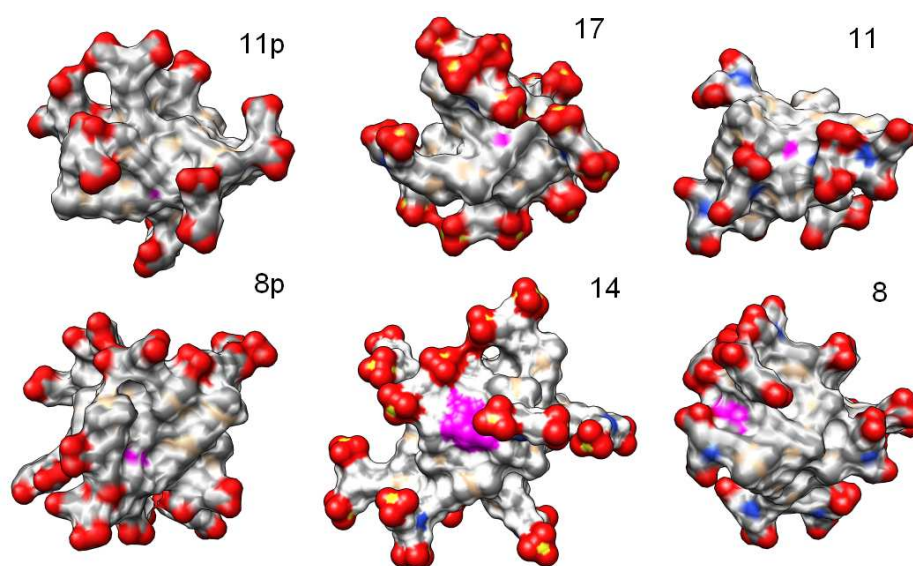

**Figure S1.** Computer models of dendrimers **8**, **11**, **14** and **17** simulated in salt water with visualized molecular surfaces. Dendrimers labeled as **8p**, **11p** are dendrimers **8** and **11** with protonated nitrogens but deprotonated peripheral anionic groups. The dendrimer core is colored in magenta.

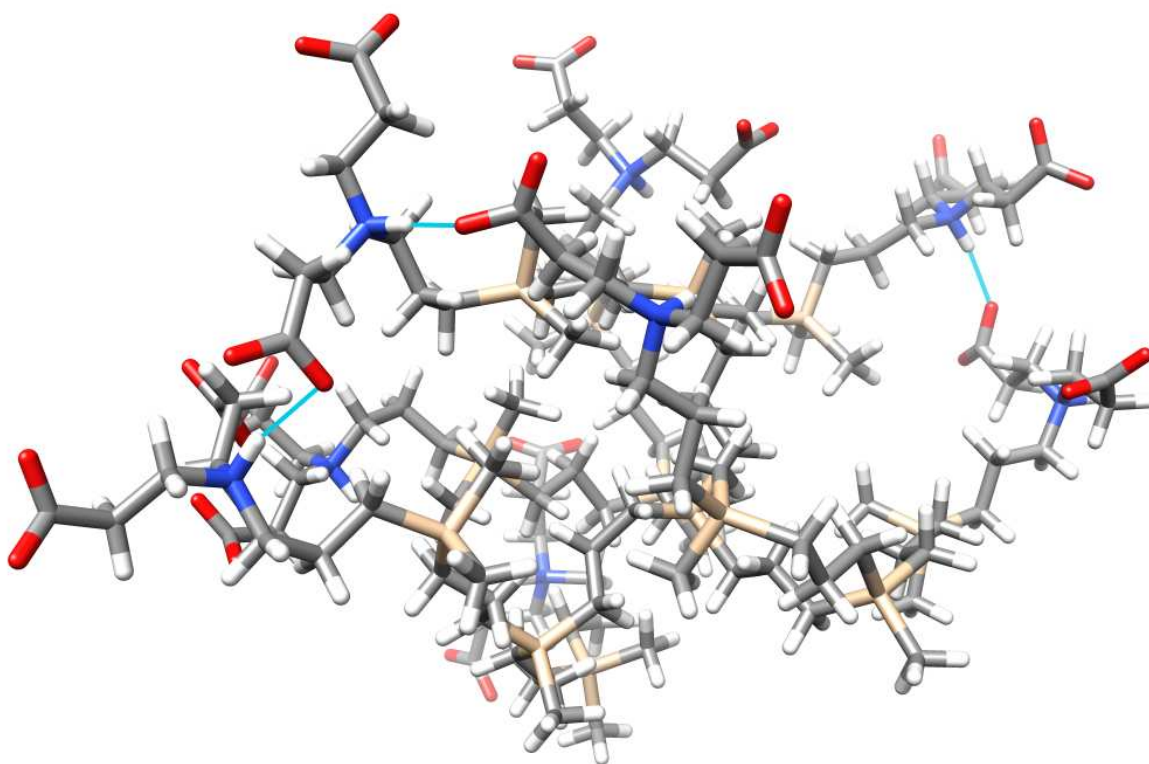

**Figure S2.** Visualization of dendrimer **11p** including 3 intra-molecular hydrogen bonds (or more precisely salt bridges) which are coloured in cyan.

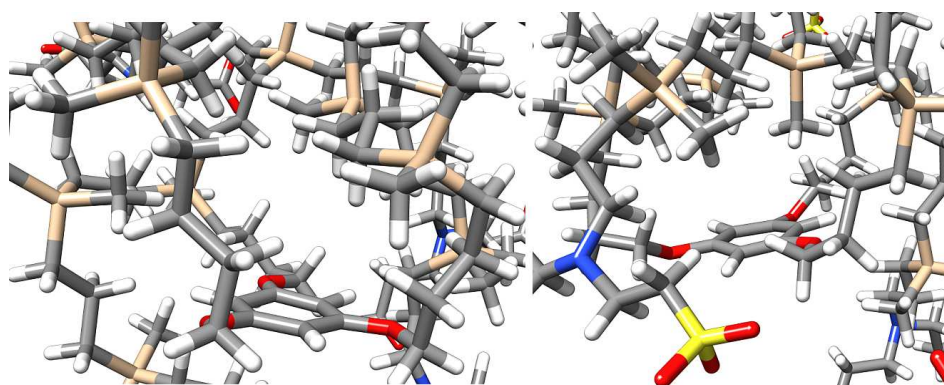

**Figure S3.** View of the small internal cavities within the carboxylate-terminated (left) and sulfonate-terminated (right) polyphenoxo cored dendrimers.

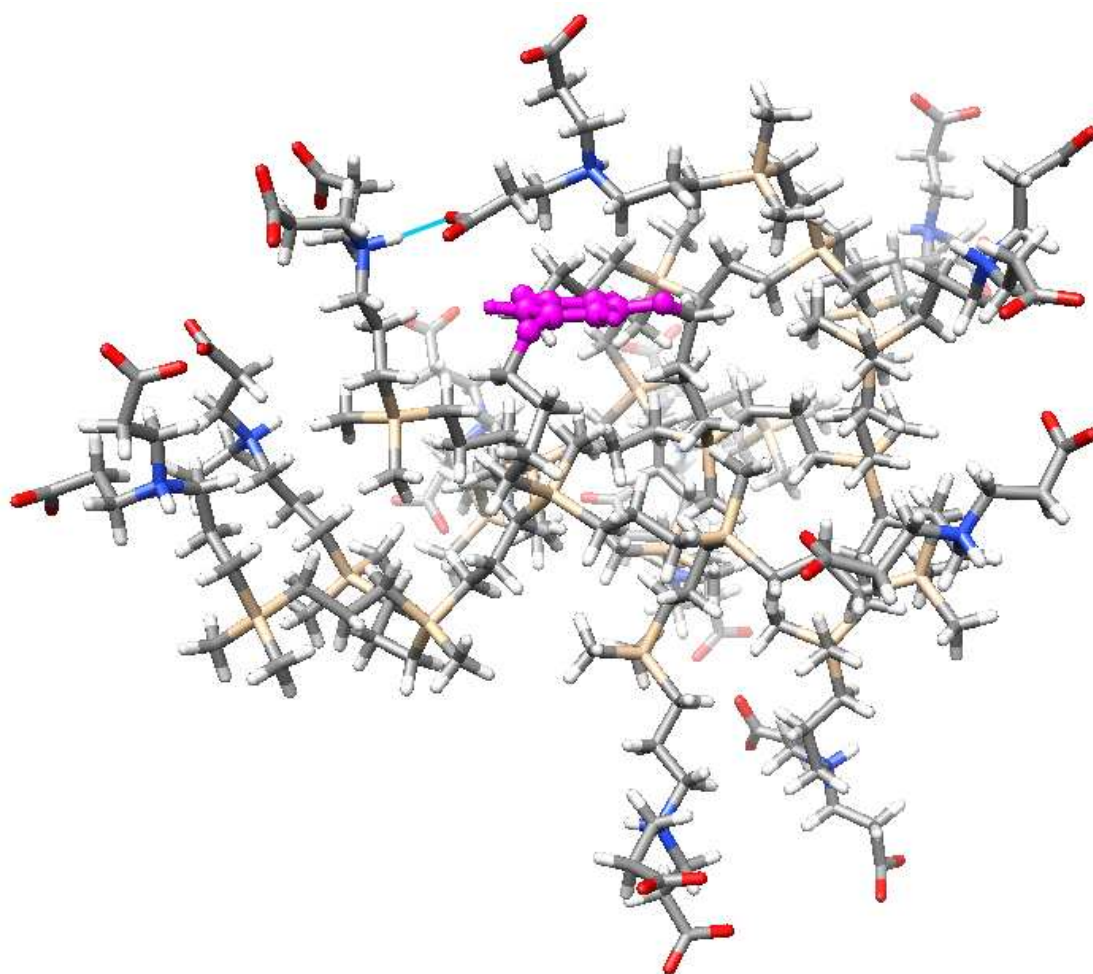

**Figure. S4.** Backfolding in case of dendrimer **8p** supported with NH...O hydrogen bond (in cyan). Dendrimer core is highlighted with magenta color.

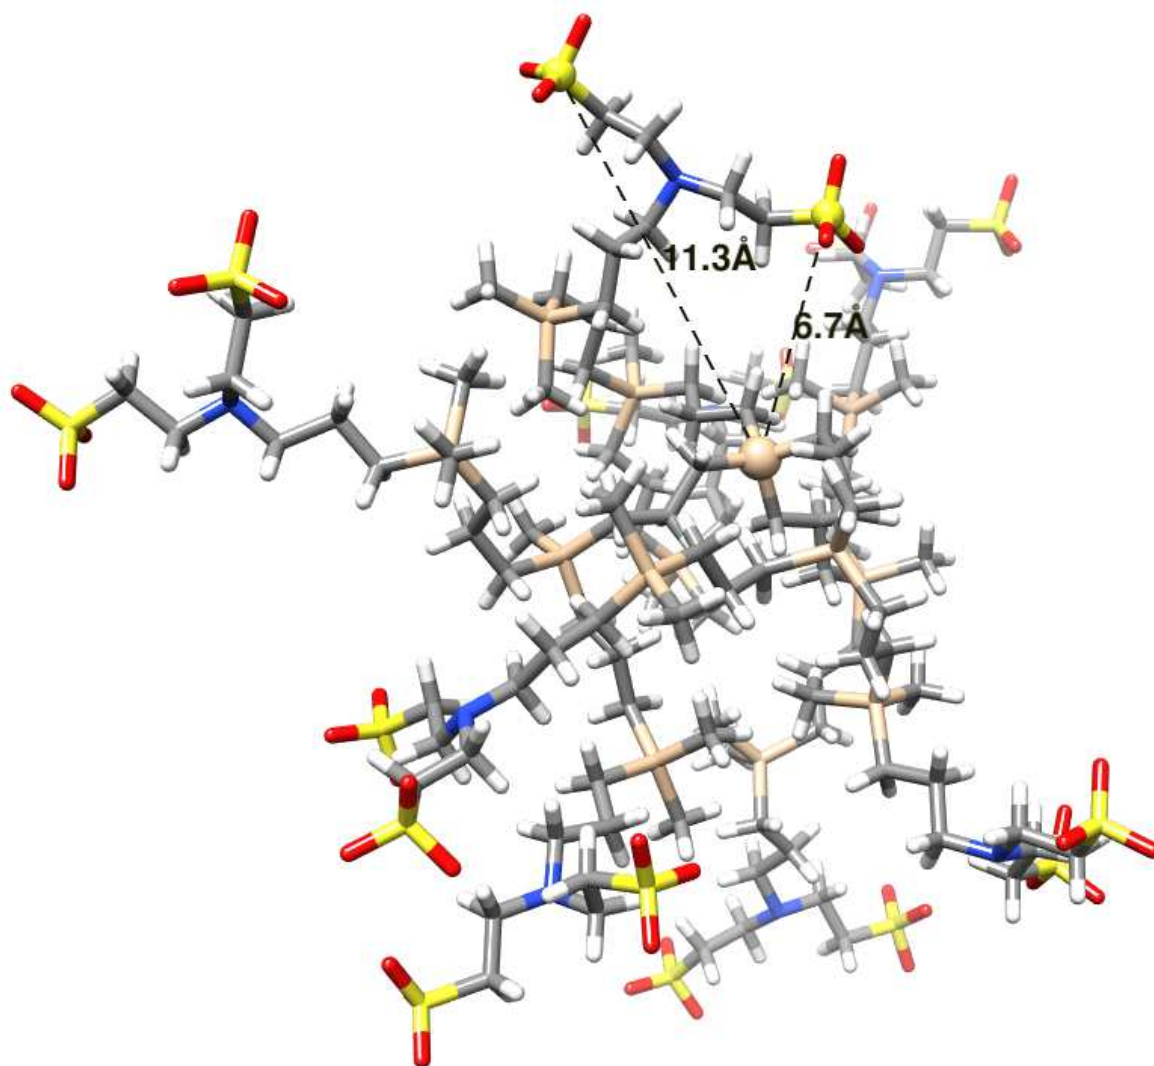

**Figure S5.** Illustration of back-folding in case of dendrimer 17. Si core atom is in “sphere” representation.

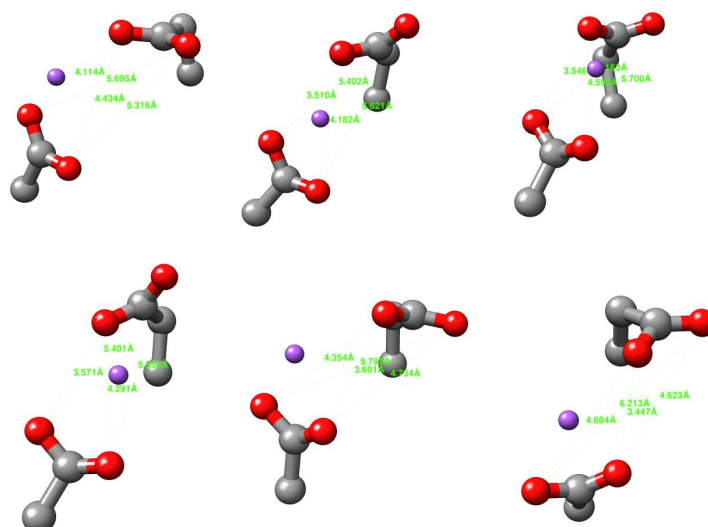

**Figure S6.** Six configurations of the same CO<sub>2</sub> pair from the dendrimer **8** surface coordinating Na<sup>+</sup> ion. The configurations were obtained at the end of the simulation in order: top-left -> top-right -> bottom-left -> bottom-right. Each two neighbouring snapshots (with respect to the order) are separated with 25000 of 2 fs steps (50 ps) so the time interval between the first and the last frame is 0.3 ns. The small numbers denotes the mutual distances of oxygen atoms which span distances from *ca* 3.5 Å to 6 Å.

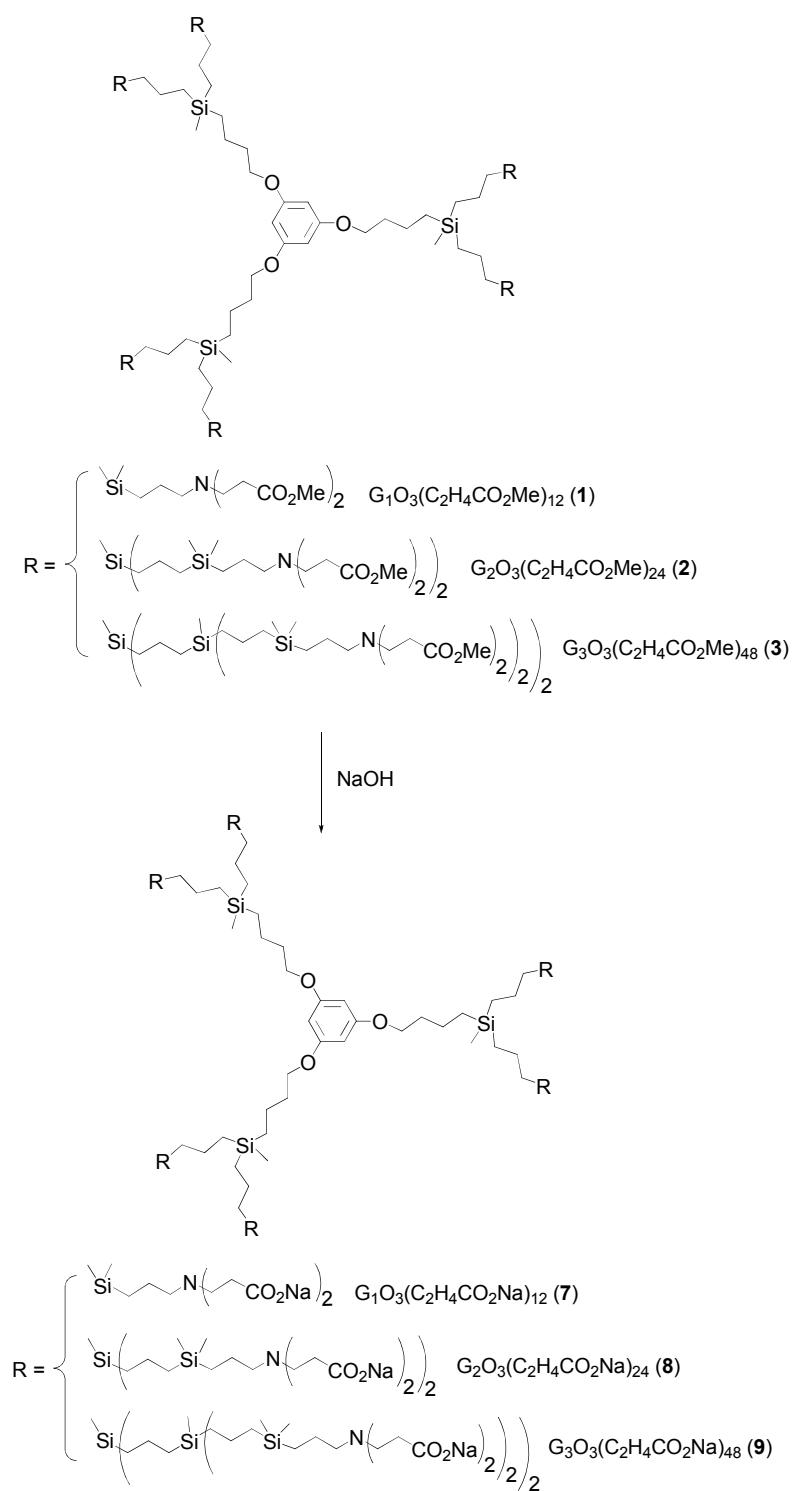

**Scheme S7.** Synthesis of anionic dendrimers **7-9**.



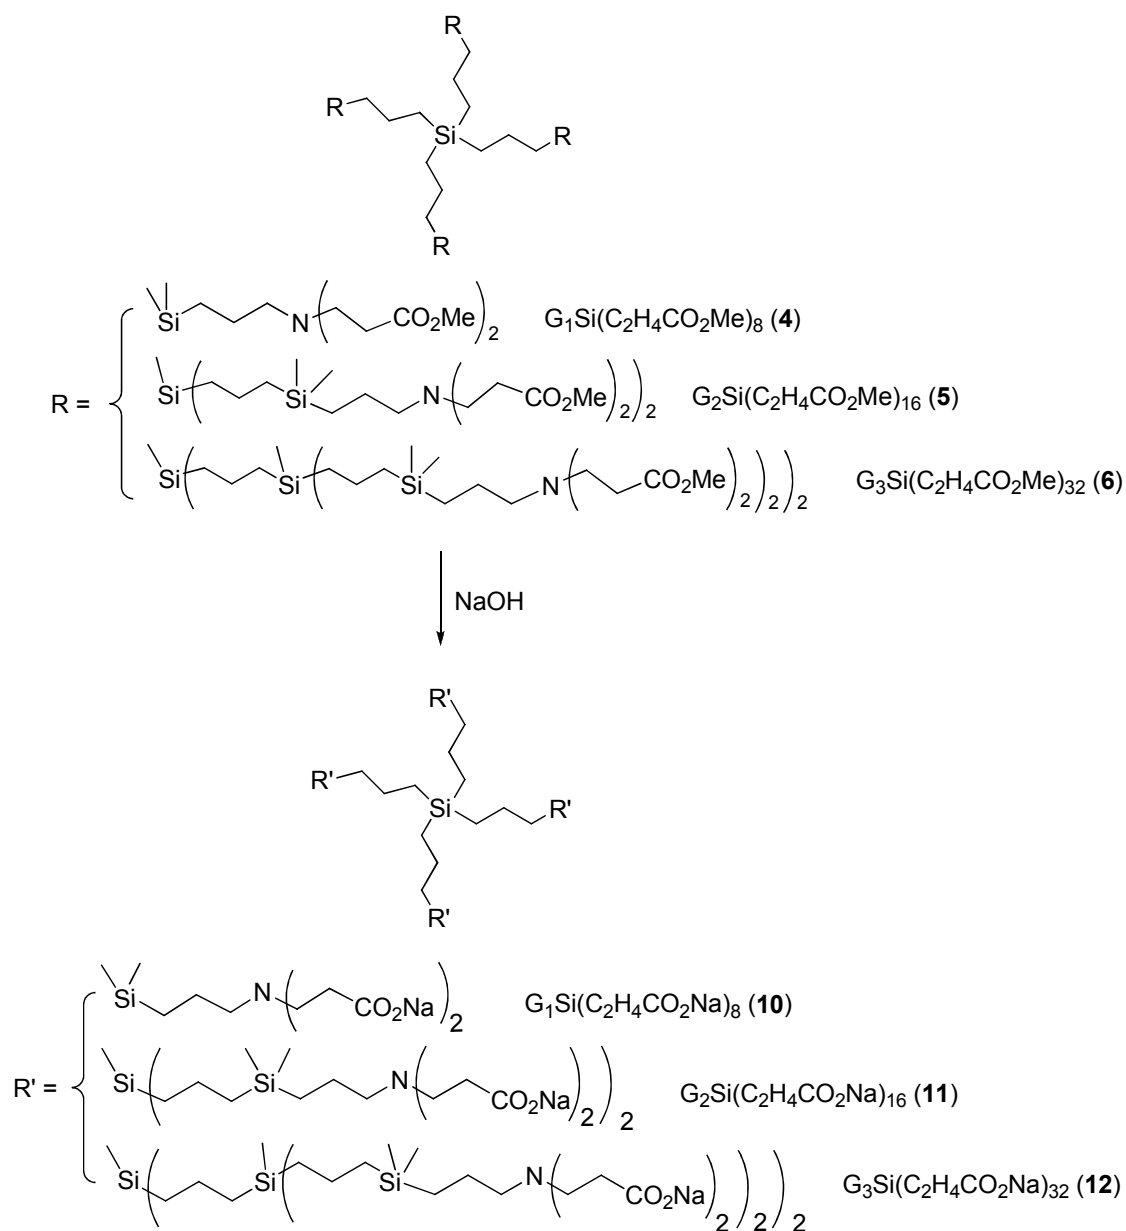

**Scheme S8.** Synthesis of anionic dendrimers **10-12**.

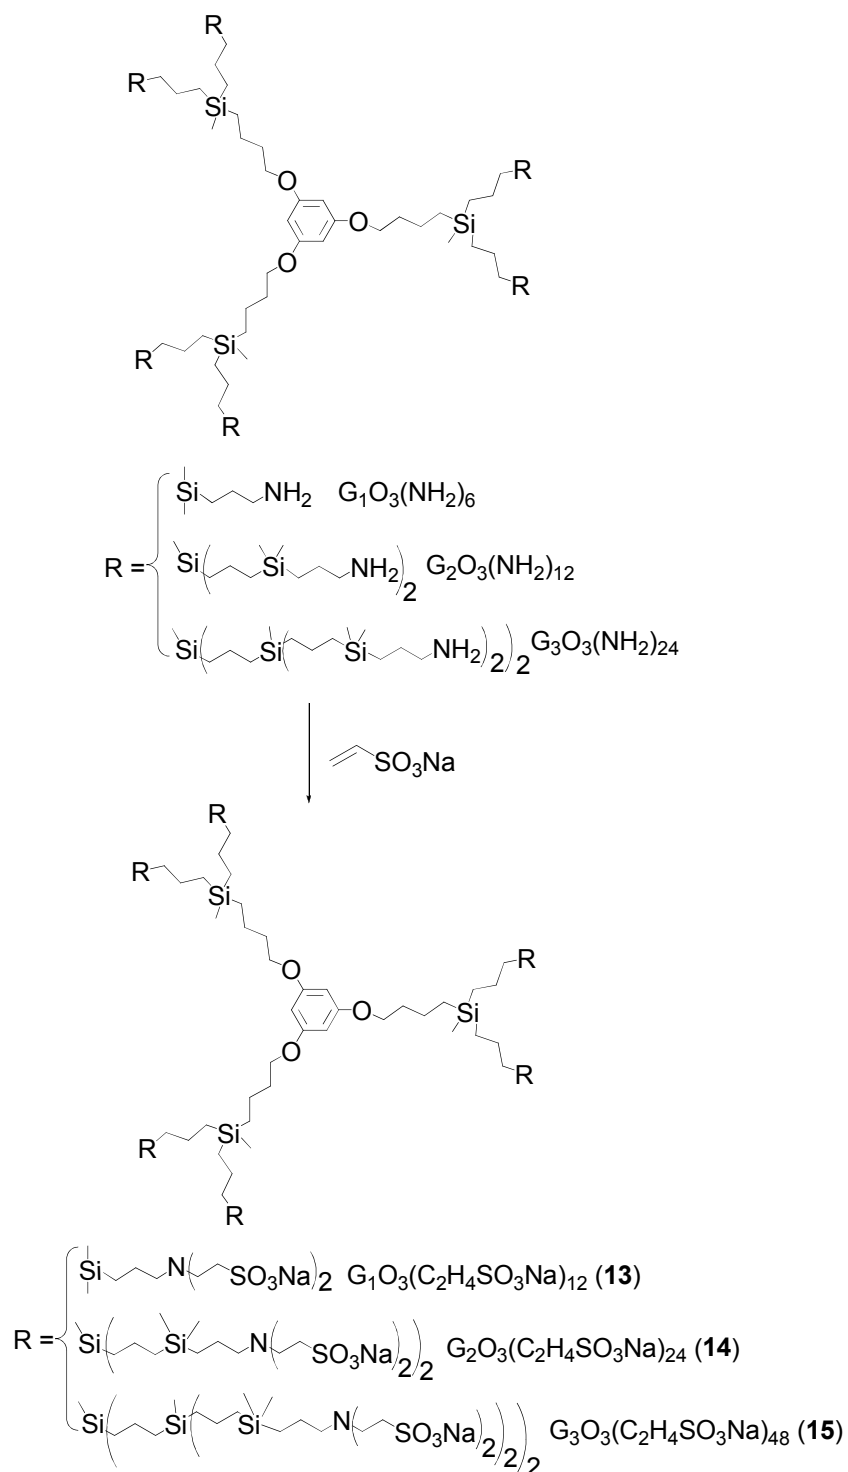

**Scheme S9.** Synthesis of anionic dendrimers **13-15**.

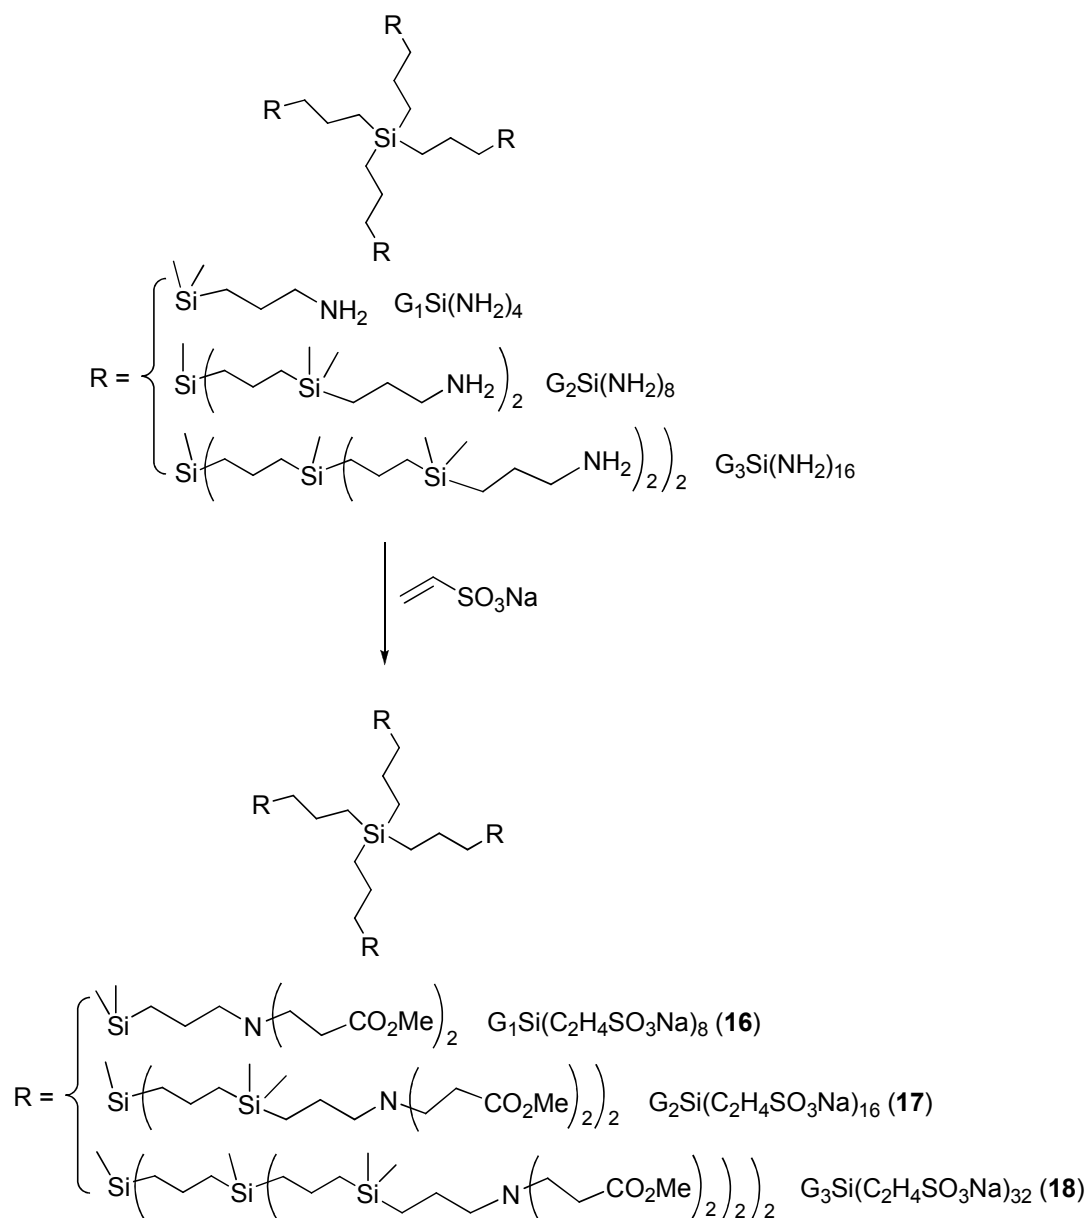

**Scheme S10.** Synthesis of anionic dendrimers **16-18**.

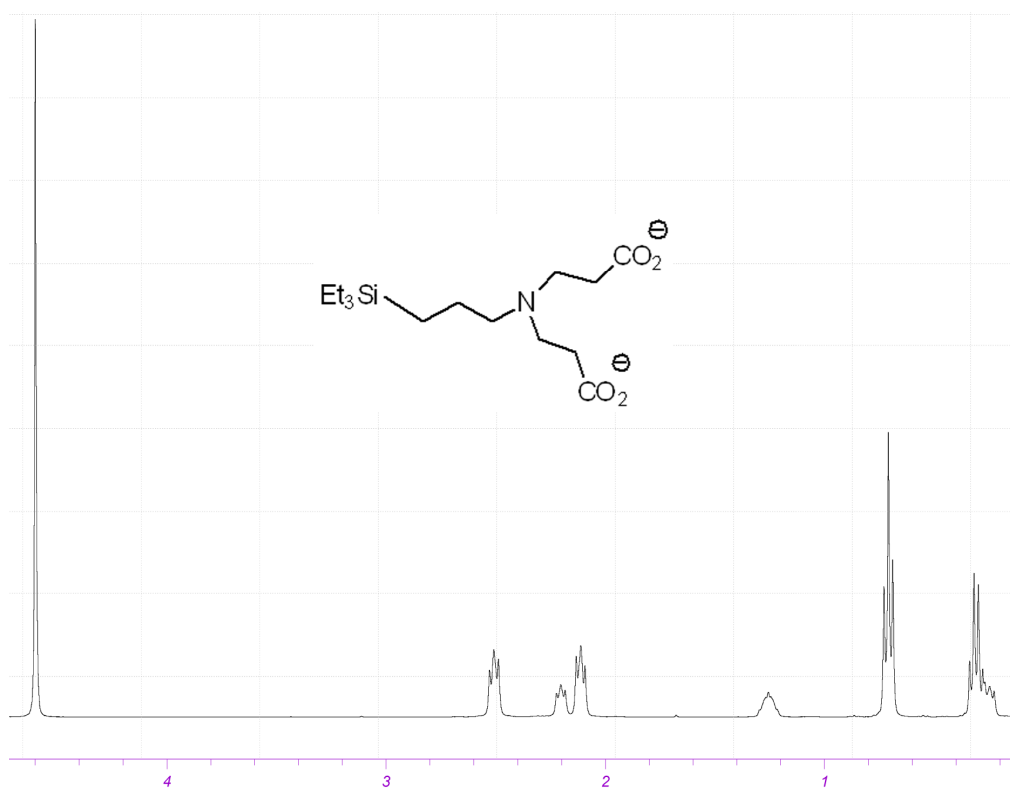

**Figure S11.** <sup>1</sup>H NMR spectrum of G<sub>0</sub>N(CO<sub>2</sub>Na)<sub>2</sub> (B).

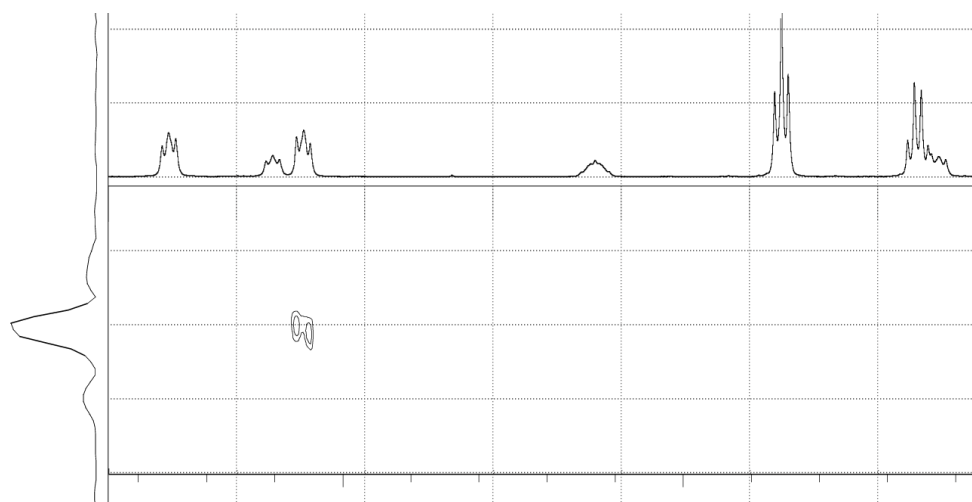

**Figure S12.** <sup>15</sup>N NMR spectrum of G<sub>0</sub>N(CO<sub>2</sub>Na)<sub>2</sub> (B).

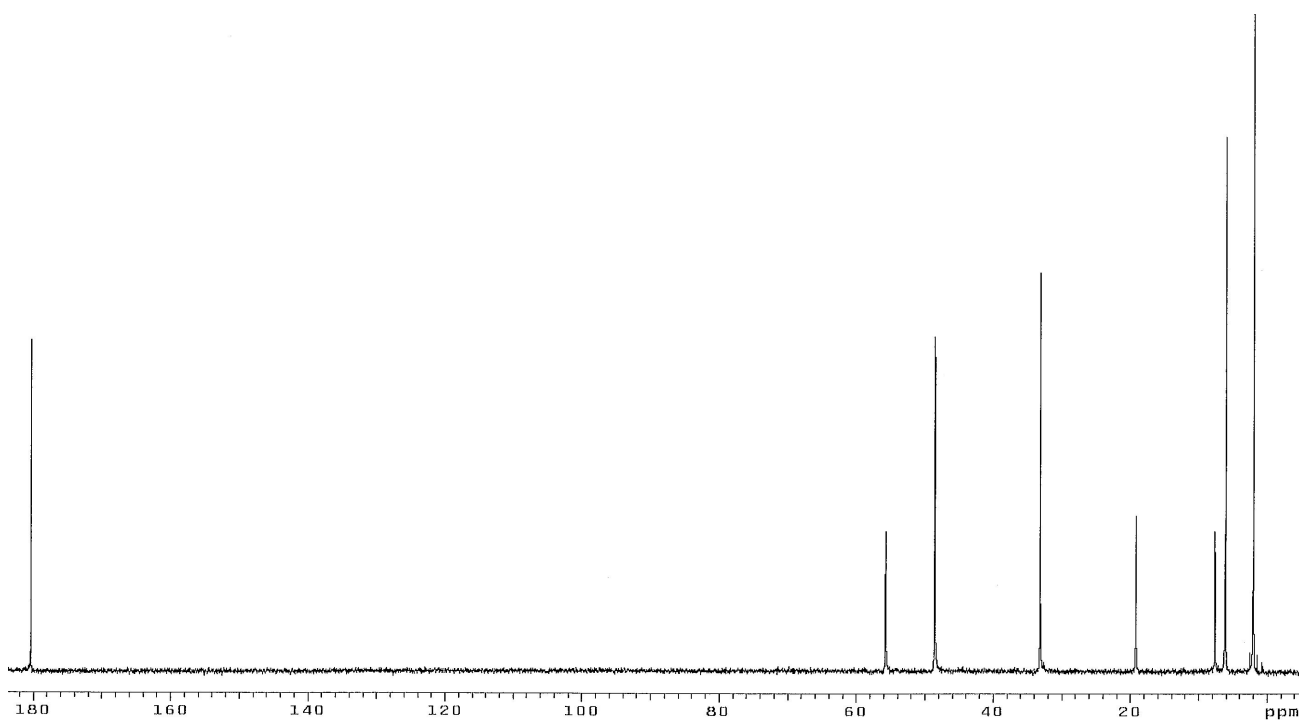

**Figure S13.**  $^{13}\text{C}$  NMR spectrum of  $\text{G}_0\text{N}(\text{CO}_2\text{Na})_2$  (**B**).

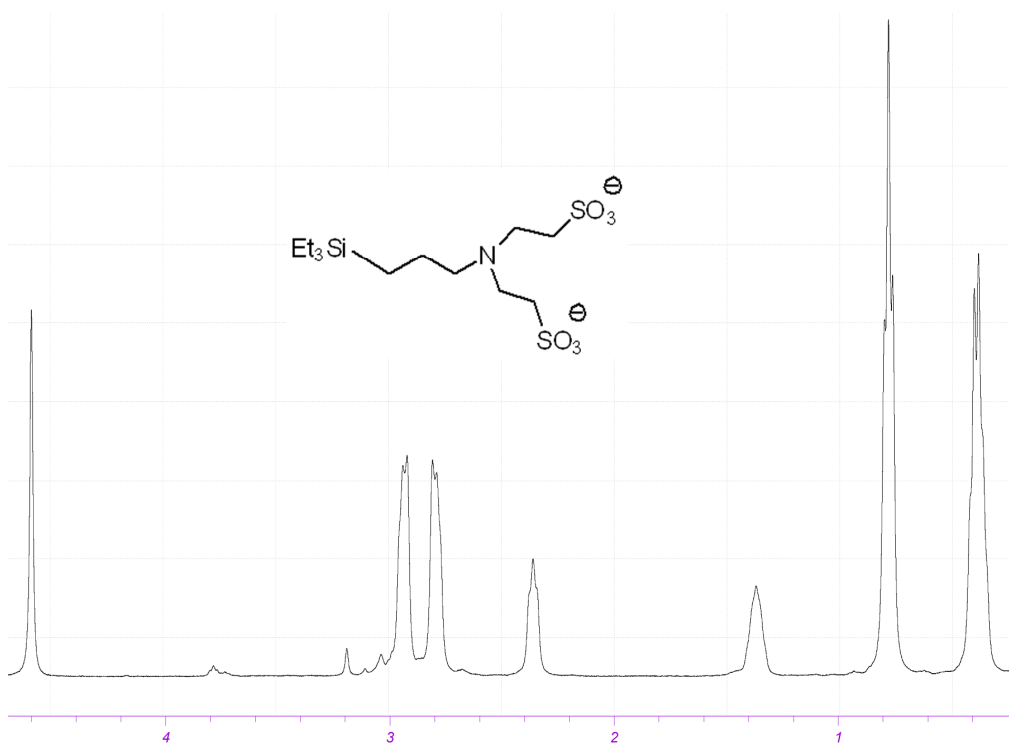

**Figure S14.**  $^1\text{H}$  NMR spectrum of  $\text{G}_0\text{N}(\text{SO}_3\text{Na})_2$  (**D**).

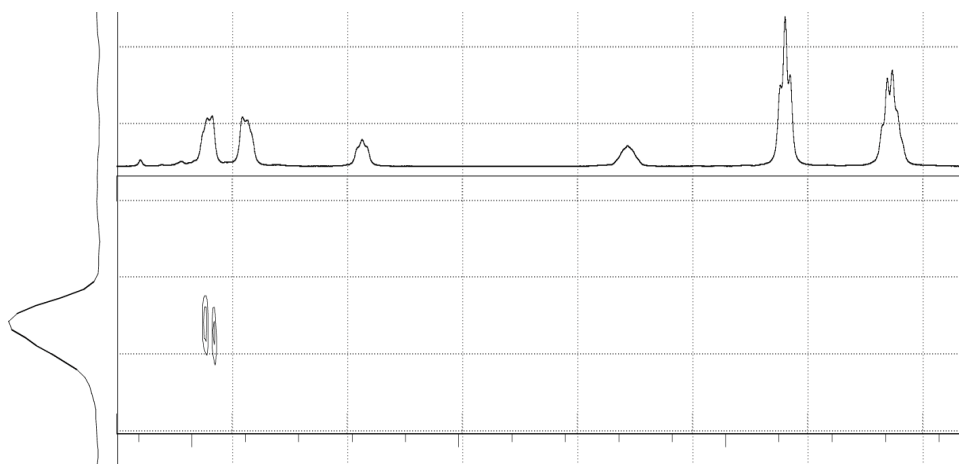

**Figure S15.**  $^{15}\text{N}$  NMR spectrum of  $\text{G}_0\text{N}(\text{SO}_3\text{Na})_2$  (**D**).

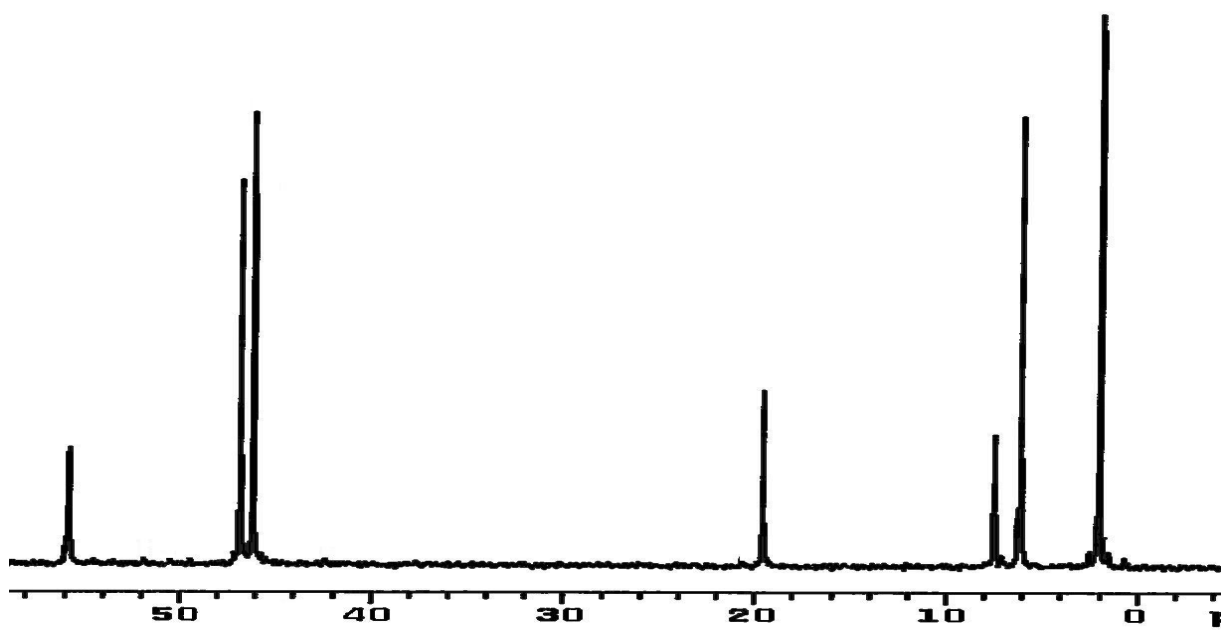

**Figure S16.**  $^{13}\text{C}$  NMR spectrum of  $\text{G}_0\text{N}(\text{SO}_3\text{Na})_2$  (**D**).

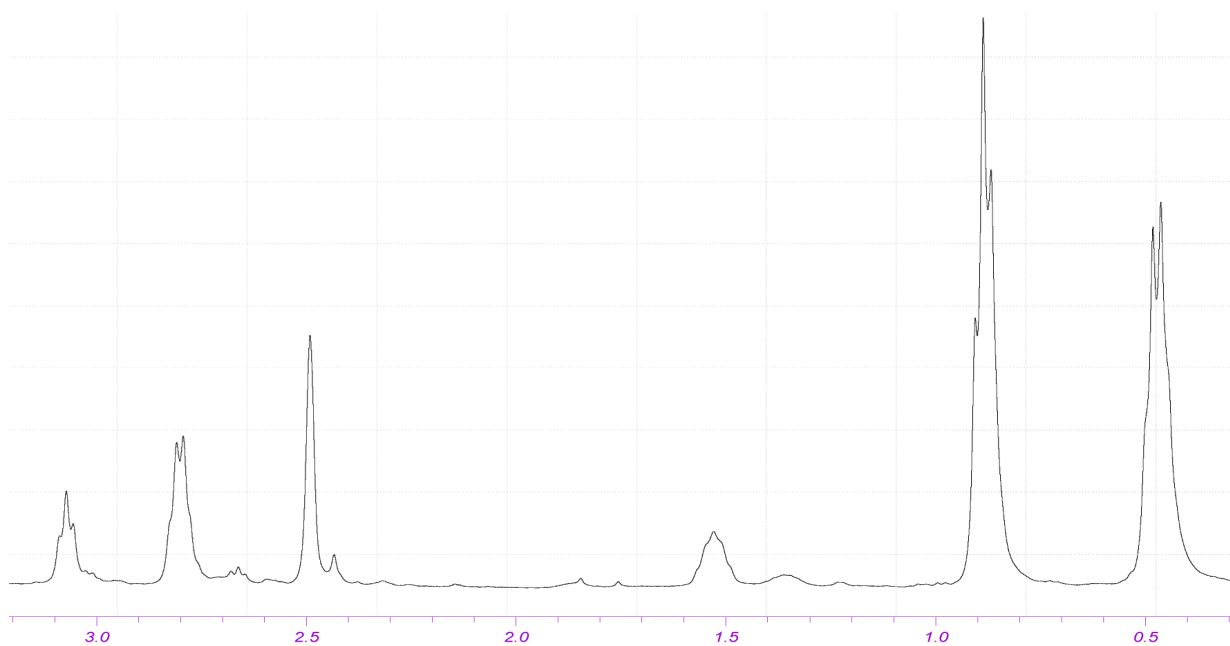

**Figure S17.**  $^1\text{H}$  NMR spectrum of  $\text{G}_0\text{NH}(\text{SO}_3\text{Na})$  (**E**).

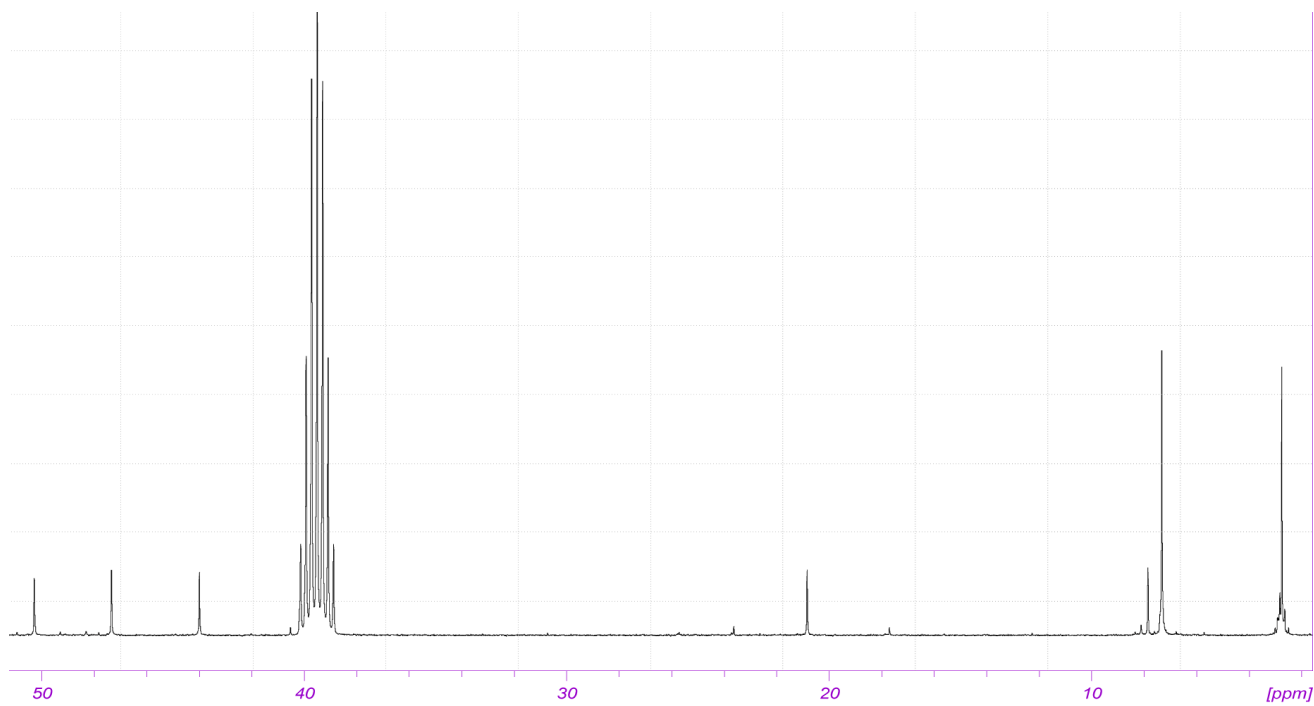

**Figure S18.**  $^{13}\text{C}$  NMR spectrum of  $\text{G}_0\text{NH}(\text{SO}_3\text{Na})$  (**E**).

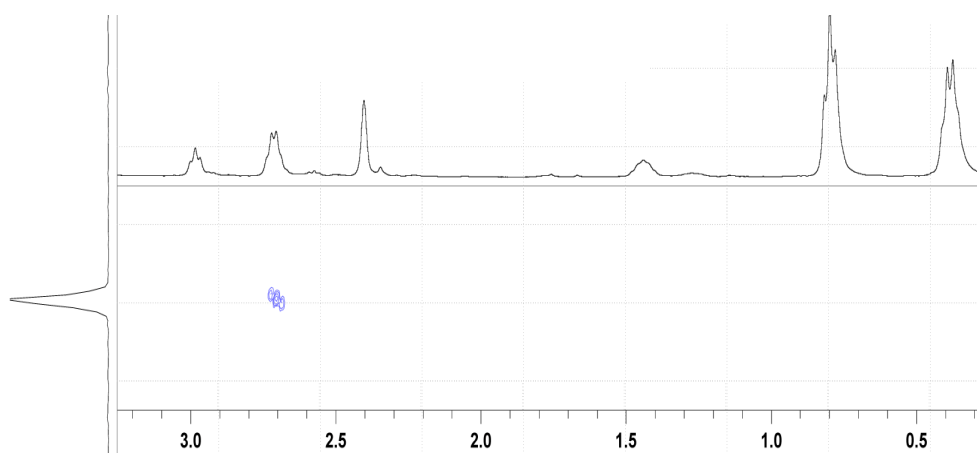

**Figure S19.**  $^{15}\text{N}$  NMR spectrum of  $\text{G}_0\text{NH}(\text{SO}_3\text{Na})$  (**E**).

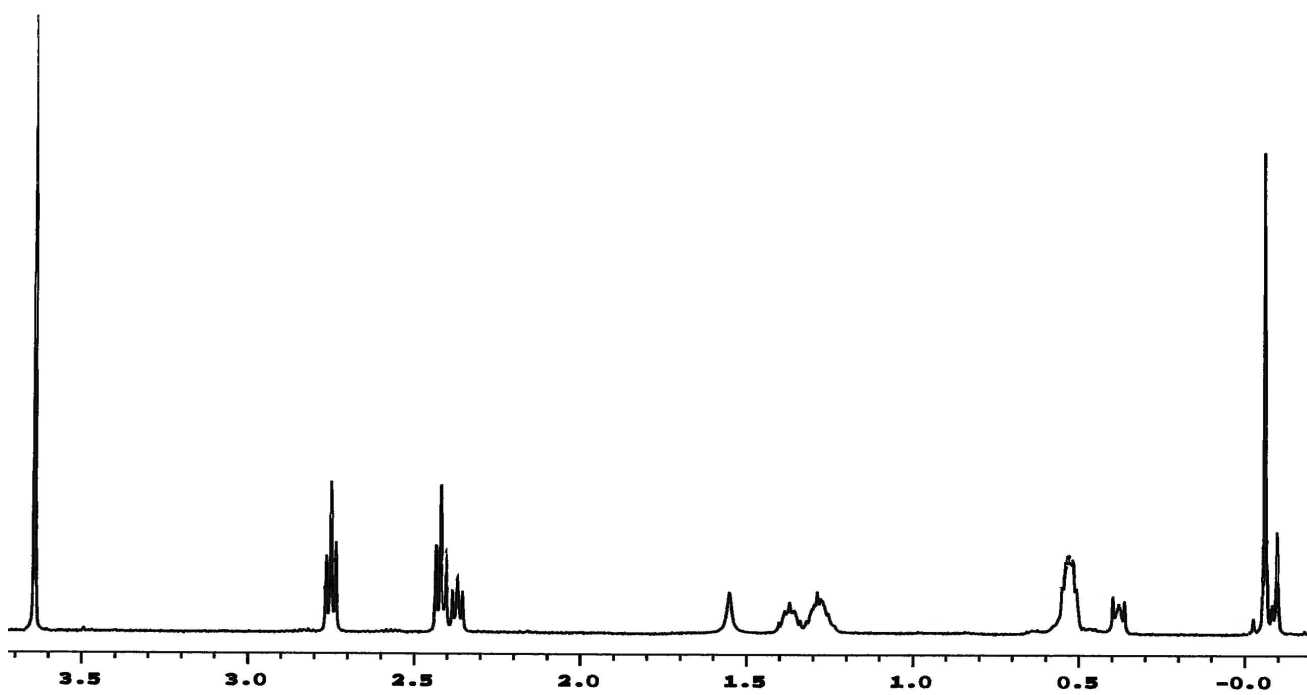

**Figure S20.**  $^1\text{H}$  NMR spectrum of  $\text{G}_2\text{Si}(\text{C}_2\text{H}_4\text{CO}_2\text{Me})_{16}$  (**5**).



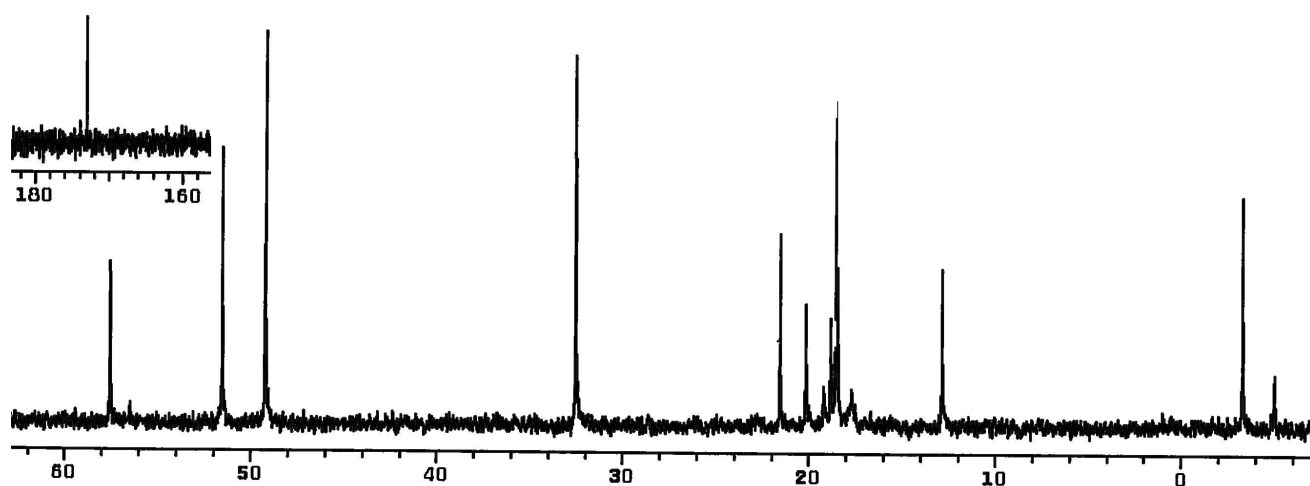

**Figure S21.**  $^{13}\text{C}$  NMR spectrum of  $\text{G}_2\text{Si}(\text{C}_2\text{H}_4\text{CO}_2\text{Me})_{16}$  (**5**).

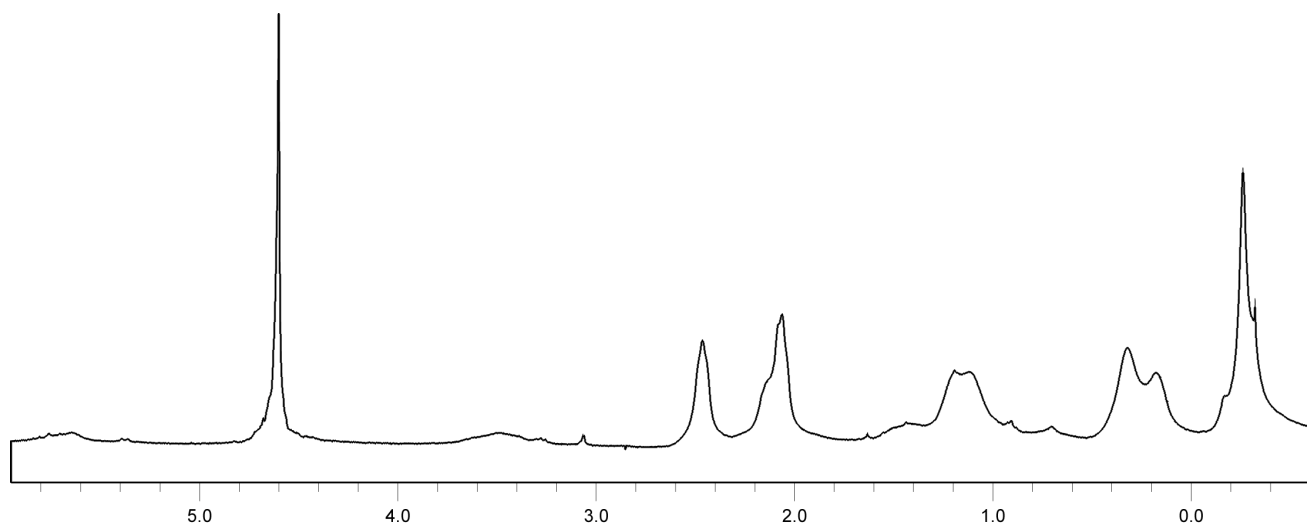

**Figure S22.**  $^1\text{H}$  NMR spectrum of  $\text{G}_1\text{O}_3(\text{C}_2\text{H}_4\text{CO}_2\text{Na})_{12}$  (**7**).

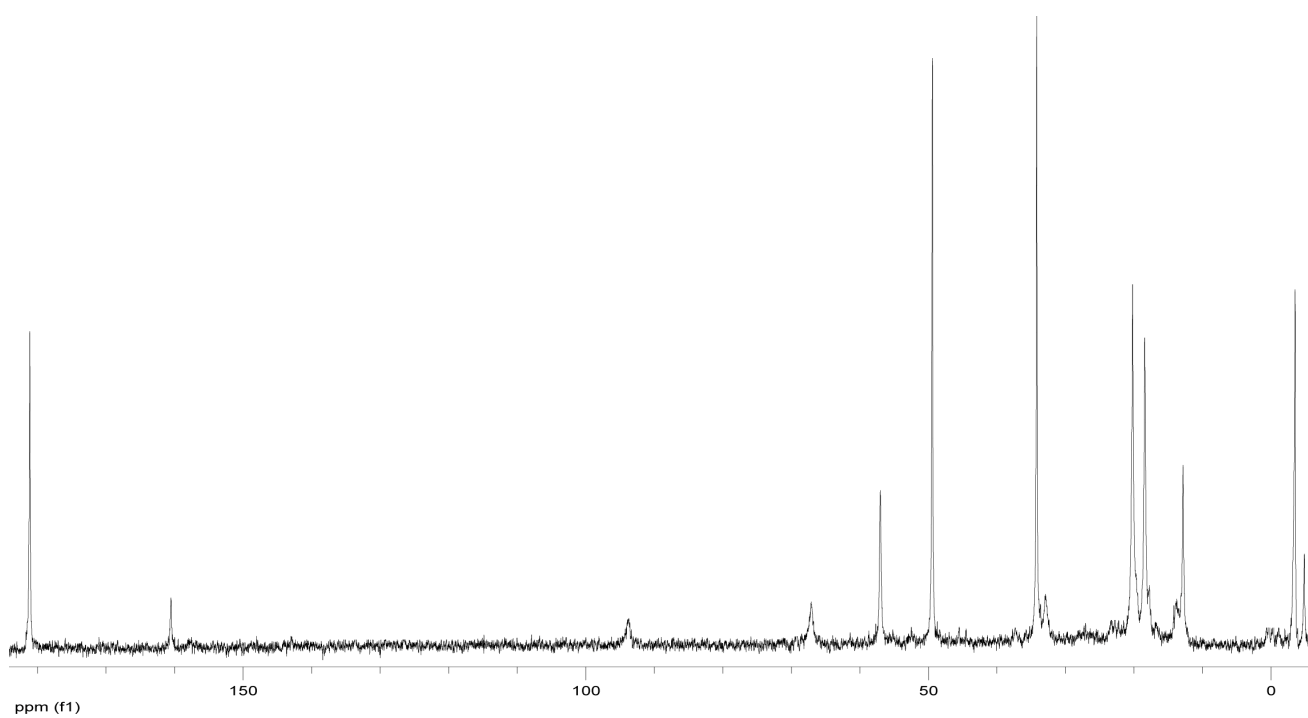

**Figure S23.**  $^{13}\text{C}$  NMR spectrum of  $\text{G}_1\text{O}_3(\text{C}_2\text{H}_4\text{CO}_2\text{Na})_{12}$  (**7**).

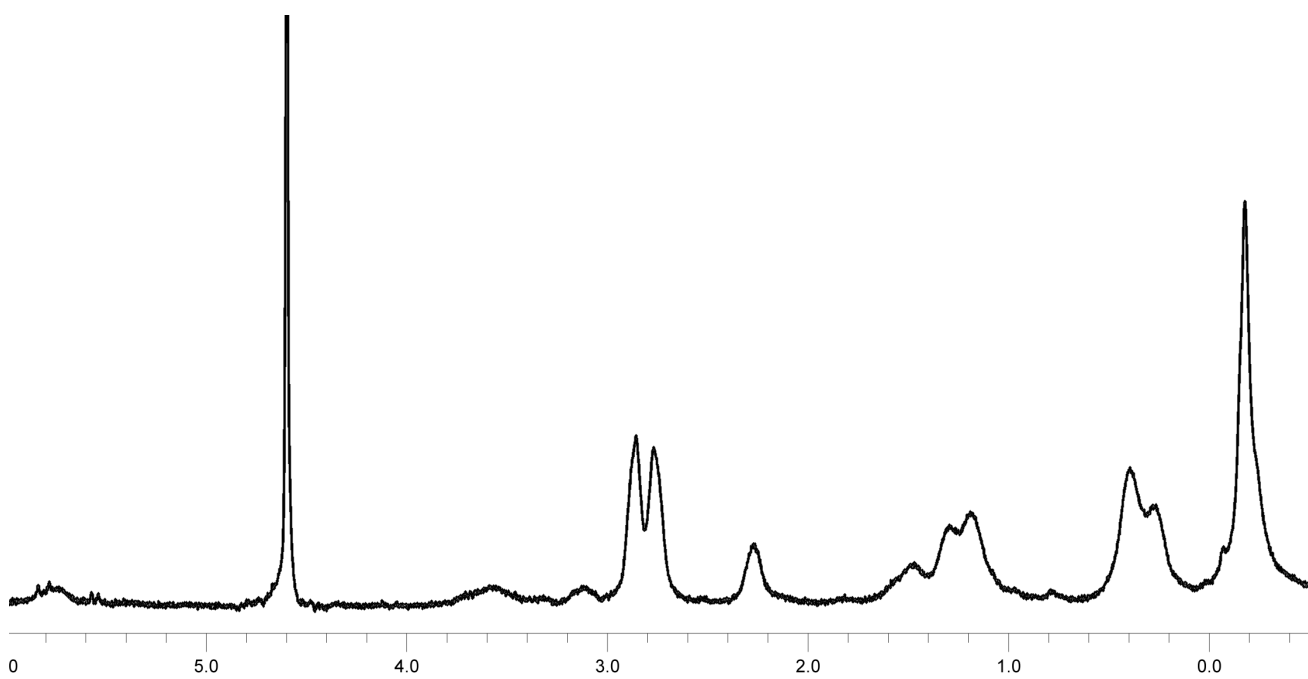

**Figure S24.**  $^1\text{H}$  NMR spectrum of  $\text{G}_1\text{O}_3(\text{C}_2\text{H}_4\text{SO}_3\text{Na})_{12}$  (**13**).

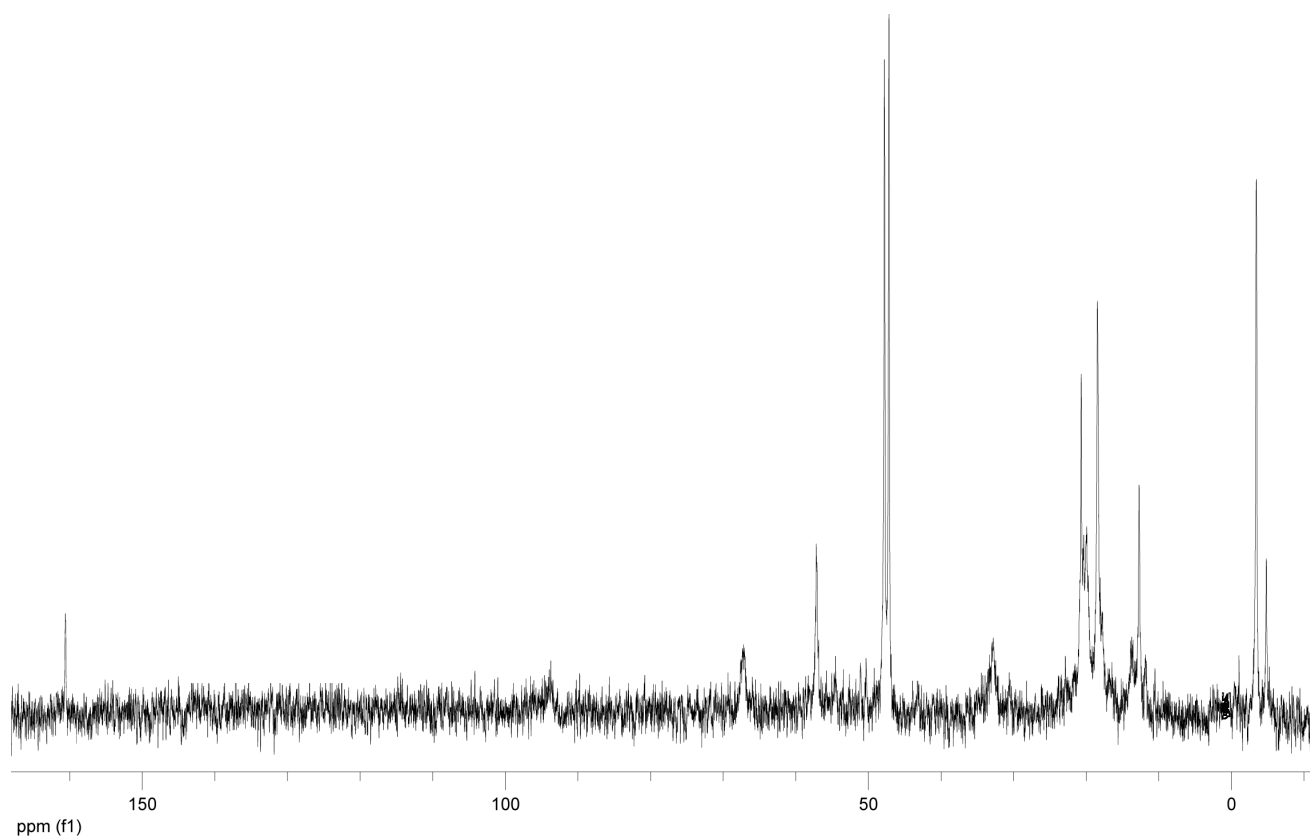

**Figure S25.**  $^{13}\text{C}$  NMR spectrum of  $\text{G}_1\text{O}_3(\text{C}_2\text{H}_4\text{SO}_3\text{Na})_{12}$  (**13**).

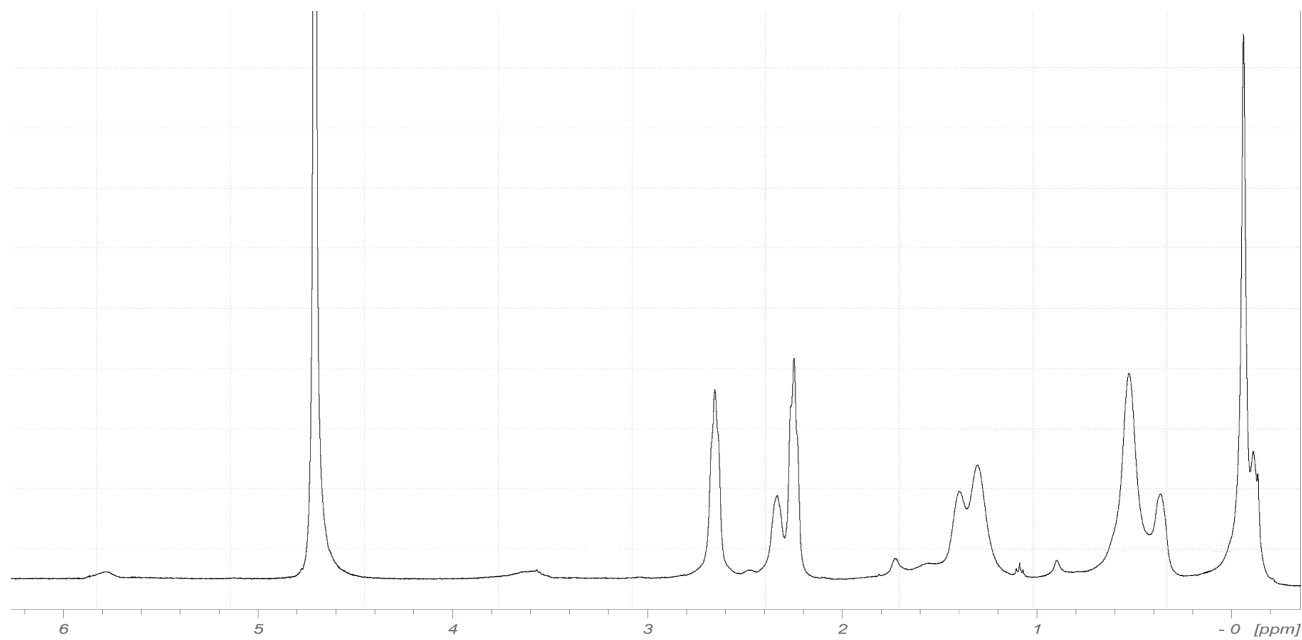

**Figure S26.**  $^1\text{H}$  NMR spectrum of  $\text{G}_2\text{O}_3(\text{C}_2\text{H}_4\text{CO}_2\text{Na})_{24}$  (**8**).

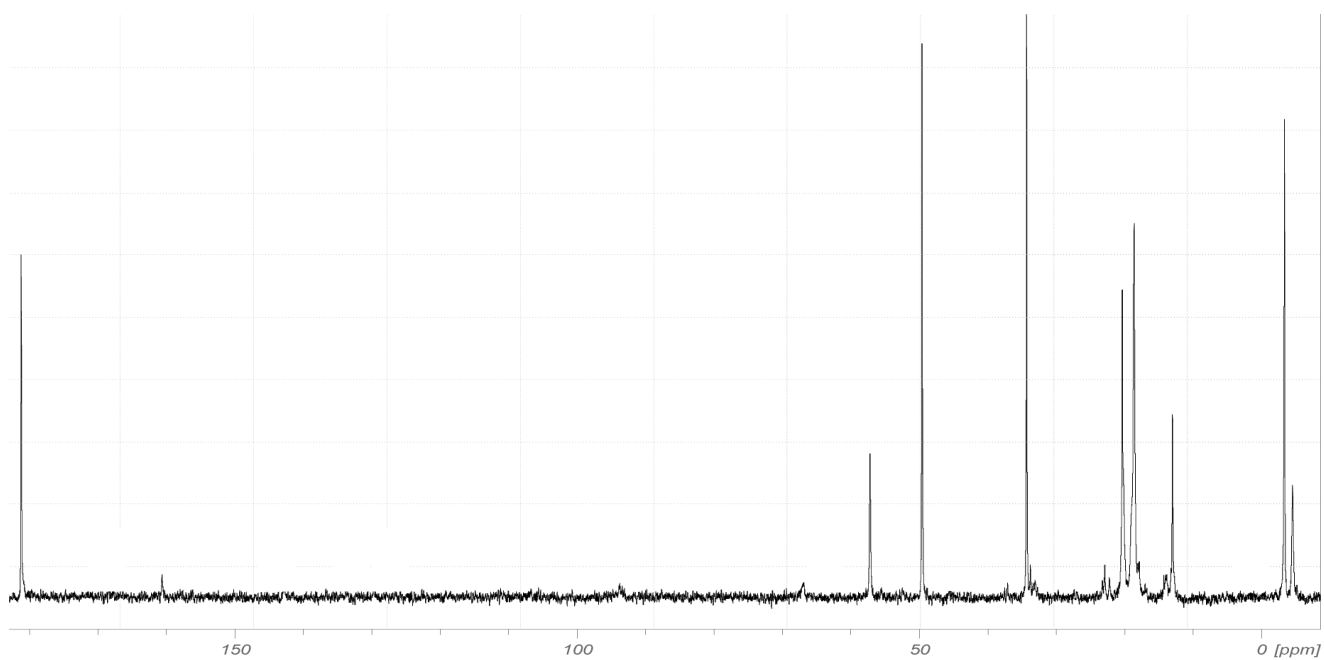

**Figure S27.**  $^{13}\text{C}$  NMR spectrum of  $\text{G}_2\text{O}_3(\text{C}_2\text{H}_4\text{CO}_2\text{Na})_{24}$  (**8**).

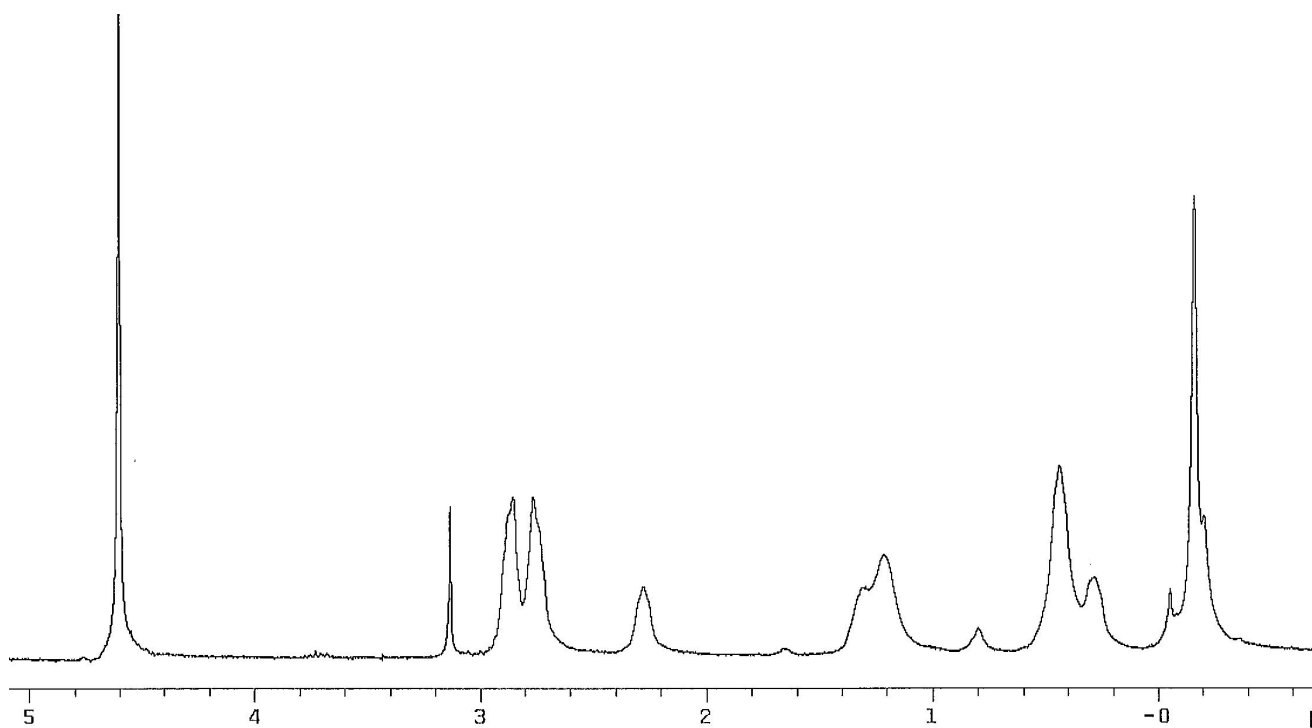

**Figure S28.**  $^1\text{H}$  NMR spectrum of  $\text{G}_2\text{Si}(\text{C}_2\text{H}_4\text{SO}_3\text{Na})_{16}$  (**17**).

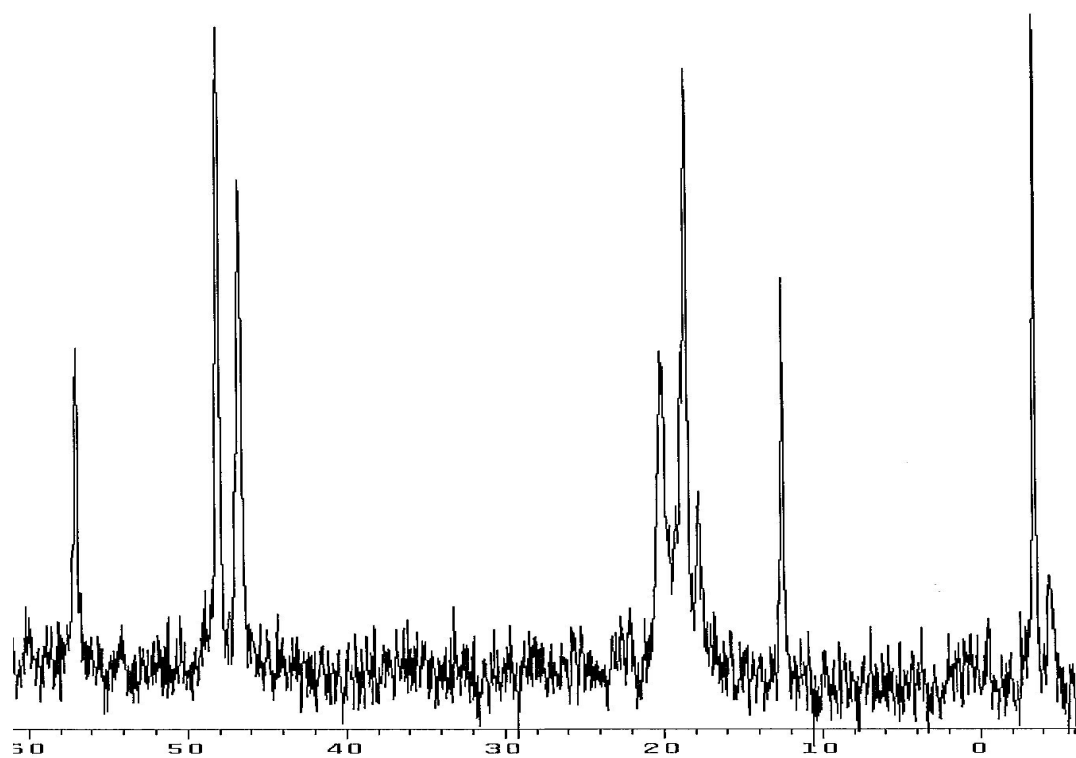

**Figure S29.**  $^{13}\text{C}$  NMR spectrum of  $\text{G}_2\text{Si}(\text{C}_2\text{H}_4\text{SO}_3\text{Na})_{16}$  (**17**).

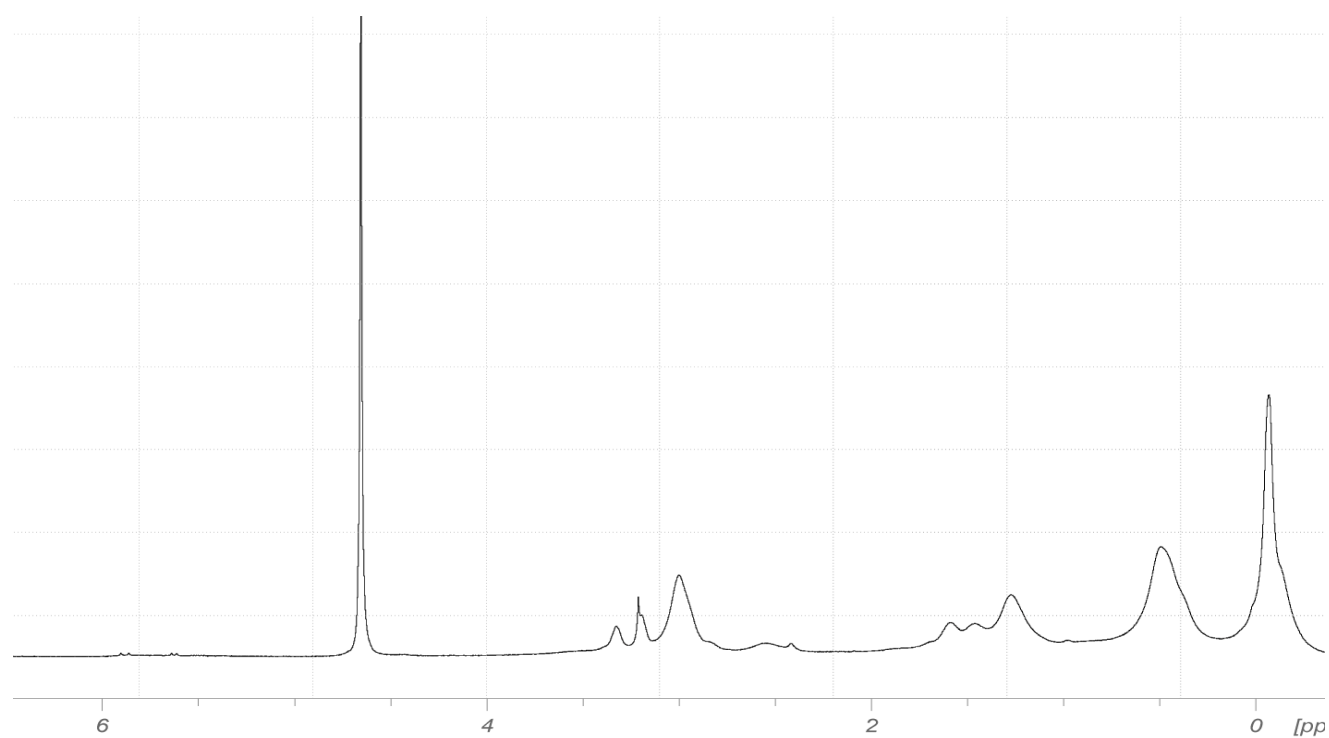

**Figure S30.**  $^1\text{H}$  NMR spectrum of  $\text{G}_3\text{O}_3(\text{C}_2\text{H}_4\text{SO}_3\text{Na})_{48}$  (**15**).

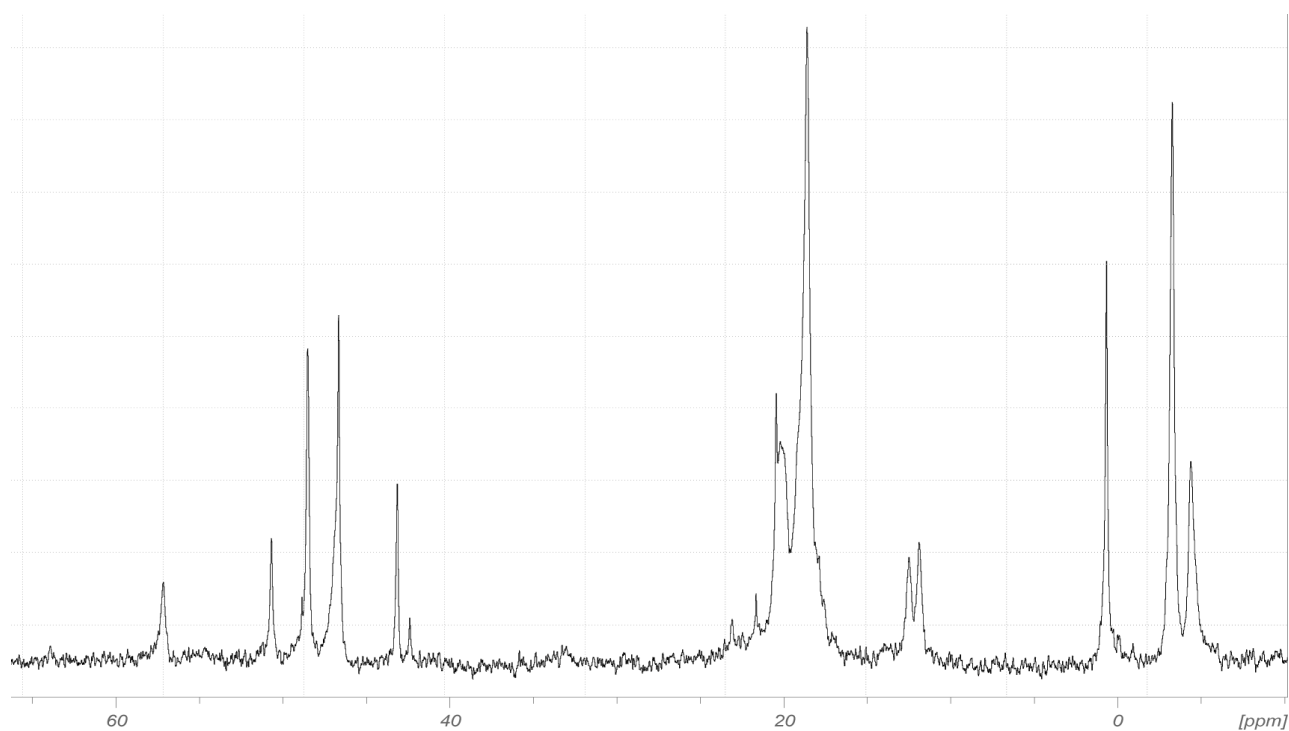

**Figure S31.**  $^{13}\text{C}$  NMR spectrum of  $\text{G}_3\text{O}_3(\text{C}_2\text{H}_4\text{SO}_3\text{Na})_{48}$  (**15**).

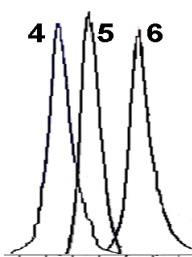

**Figure S32.** GPC of compounds 4-6.

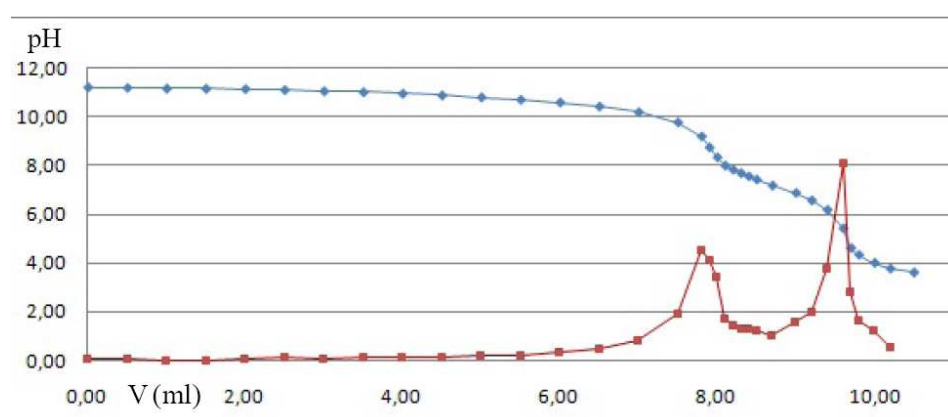

**Figure S33.** Titration curve (blue) and first derivative (red) of  $\text{G}_0\text{N}(\text{SO}_3\text{Na})_2$  (**D**).

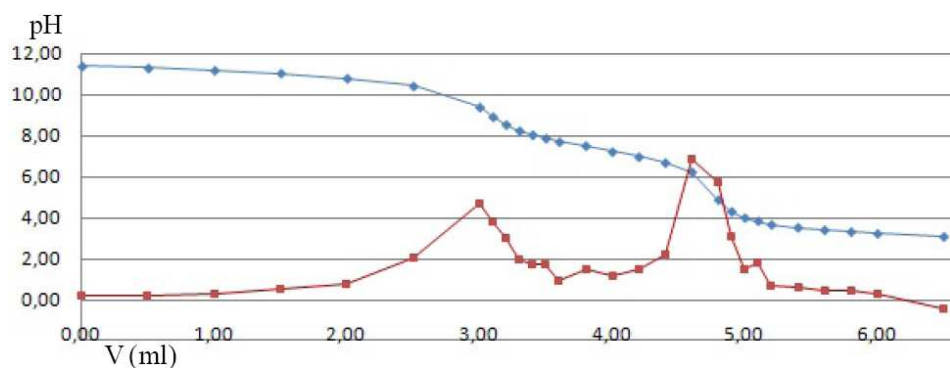

**Figure S34.** Titration curve (blue) and first derivative (red) of G<sub>0</sub>NH(SO<sub>3</sub>Na) (**E**).

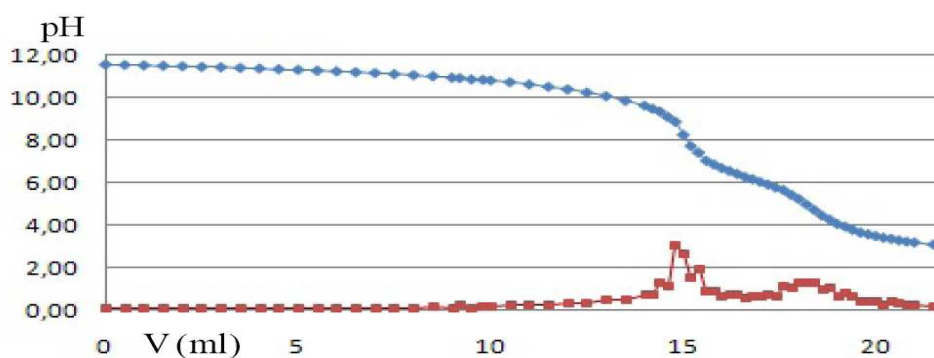

**Figure S35.** Titration curve (blue) and first derivative (red) of G<sub>2</sub>Si(CO<sub>2</sub>Na)<sub>16</sub> (**11**).

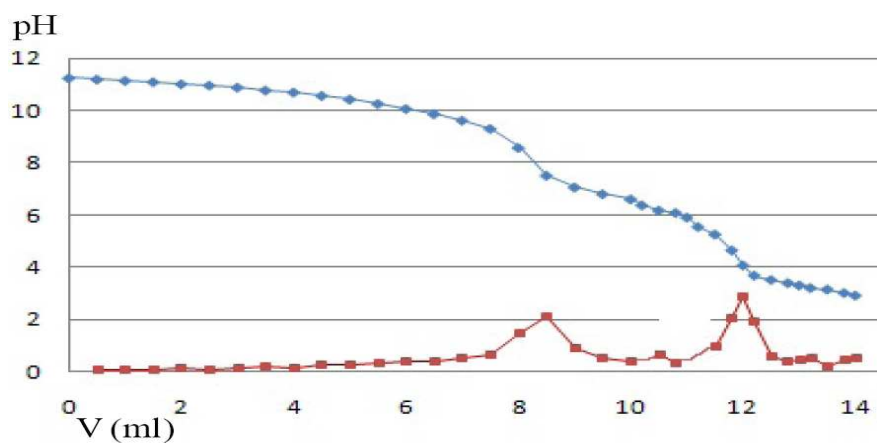

**Figure S36.** Titration curve (blue) and first derivative (red) of G<sub>2</sub>Si(SO<sub>3</sub>Na)<sub>16</sub> (**17**).
